# Supplementary material for: Single-molecule magnet behavior in a mononuclear dysprosium(iii) complex with 1-methylimidazole
Source: Royal Society of Chemistry journal article supplement (doi:10.1039/c6ra25038f), 2017-01-01
Supplement: c6ra25038f1.pdf [file c6ra25038f1.pdf]

# Single-Molecule Magnet Behavior in a Mononuclear Dysprosium(III) Complex with 1-methylimidazole

*Binling Yao*<sup>†</sup>, *Bin Gu*<sup>†</sup>, *Meihui Su*<sup>†</sup>, *Guoliang Li*<sup>†</sup>, *Yue Ma*<sup>\*†</sup>, *Licun Li*<sup>†</sup>, *Qinglun Wang*<sup>†</sup>, *Peng Cheng*<sup>†</sup>,  
*Xuan Zhang*<sup>‡</sup>

<sup>†</sup> Department of Chemistry and Key Laboratory of Advanced Energy Materials Chemistry (MOE) and TKL of Metal and Molecule Based Material Chemistry, Nankai University, Tianjin 300071, China.

<sup>‡</sup> Department of Chemistry, Texas A&M University, College Station, Texas 77842, United States.

Table S1. Selected bond lengths [ $\text{\AA}$ ] and angles [deg] for compound **1**.

|                                            |            |                                            |            |
|--------------------------------------------|------------|--------------------------------------------|------------|
| Dy(1)-O(2) <sup>1</sup>                    | 2.346(4)   | N(1) <sup>1</sup> -Dy(1)-N(1)              | 141.7(2)   |
| Dy(1)-O(2)                                 | 2.346(4)   | O(1)-Dy(1)-N(1) <sup>1</sup>               | 74.51(14)  |
| Dy(1)-O(3) <sup>1</sup>                    | 2.347(3)   | O(1) <sup>1</sup> -Dy(1)-N(1) <sup>1</sup> | 75.96(14)  |
| Dy(1)-O(3)                                 | 2.347(3)   | O(1) <sup>1</sup> -Dy(1)-N(1)              | 74.51(14)  |
| Dy(1)-O(1)                                 | 2.358(4)   | O(1)-Dy(1)-N(1)                            | 75.96(14)  |
| Dy(1)-O(1) <sup>1</sup>                    | 2.358(4)   | O(1) <sup>1</sup> -Dy(1)-O(1)              | 78.12(18)  |
| Dy(1)-N(1) <sup>1</sup>                    | 2.467(4)   | O(2) <sup>1</sup> -Dy(1)-N(1)              | 110.32(15) |
| Dy(1)-N(1)                                 | 2.467(4)   | O(2)-Dy(1)-N(1)                            | 82.12(15)  |
| O(2) <sup>1</sup> -Dy(1)-N(1) <sup>1</sup> | 82.12(15)  | O(3) <sup>1</sup> -Dy(1)-N(1)              | 73.57(13)  |
| O(2) <sup>1</sup> -Dy(1)-O(1) <sup>1</sup> | 71.17(14)  | O(3) <sup>1</sup> -Dy(1)-O(1) <sup>1</sup> | 120.30(13) |
| O(2)-Dy(1)-O(1) <sup>1</sup>               | 145.06(15) | O(3) <sup>1</sup> -Dy(1)-O(1)              | 137.37(14) |
| O(2)-Dy(1)-O(1)                            | 71.17(14)  | O(3)-Dy(1)-O(1)                            | 120.30(13) |
| O(2) <sup>1</sup> -Dy(1)-O(1)              | 145.06(15) | O(3)-Dy(1)-O(1) <sup>1</sup>               | 137.37(14) |
| O(2)-Dy(1)-O(2) <sup>1</sup>               | 142.7(2)   | O(3)-Dy(1)-O(3) <sup>1</sup>               | 74.00(17)  |
| O(2) <sup>1</sup> -Dy(1)-O(3)              | 75.70(15)  | C(9)-N(1)-C(10)                            | 104.5(5)   |
| O(2) <sup>1</sup> -Dy(1)-O(3) <sup>1</sup> | 74.69(15)  | C(9)-N(1)-Dy(1)                            | 129.0(4)   |
| O(2)-Dy(1)-O(3)                            | 74.68(15)  | C(10)-N(1)-Dy(1)                           | 125.9(4)   |
| O(2)-Dy(1)-O(3) <sup>1</sup>               | 75.70(15)  | C(2)-O(1)-Dy(1)                            | 134.4(4)   |
| O(3)-Dy(1)-N(1)                            | 143.80(14) | C(4)-O(2)-Dy(1)                            | 134.0(4)   |
| O(3)-Dy(1)-N(1) <sup>1</sup>               | 73.57(13)  | C(7)-O(3)-Dy(1)                            | 133.4(3)   |
| O(3) <sup>1</sup> -Dy(1)-N(1) <sup>1</sup> | 143.80(14) |                                            |            |

Table S2. Selected bond lengths [ $\text{\AA}$ ] and angles [deg] for compound **2**.

|                                            |            |                                            |            |
|--------------------------------------------|------------|--------------------------------------------|------------|
| Tb(1)-O(3) <sup>1</sup>                    | 2.354(3)   | O(3)-Tb(1)-O(3) <sup>1</sup>               | 73.49(16)  |
| Tb(1)-O(3)                                 | 2.354(3)   | O(3)-Tb(1)-O(1)                            | 74.98(15)  |
| Tb(1)-O(1) <sup>1</sup>                    | 2.356(4)   | O(3) <sup>1</sup> -Tb(1)-O(1)              | 75.67(15)  |
| Tb(1)-O(1)                                 | 2.346(4)   | O(3)-Tb(1)-O(1) <sup>1</sup>               | 75.67(15)  |
| Tb(1)-O(2)                                 | 2.374(3)   | O(3) <sup>1</sup> -Tb(1)-O(1) <sup>1</sup> | 74.98(15)  |
| Tb(1)-O(2) <sup>1</sup>                    | 2.374(3)   | O(1)-Tb(1)-O(1) <sup>1</sup>               | 143.1(2)   |
| Tb(1)-N(1) <sup>1</sup>                    | 2.481(4)   | O(3)-Tb(1)-O(2) <sup>1</sup>               | 137.39(13) |
| Tb(1)-N(1)                                 | 2.481(4)   | O(3) <sup>1</sup> -Tb(1)-O(2) <sup>1</sup> | 120.50(13) |
| O(1)-Tb(1)-O(2) <sup>1</sup>               | 144.84(14) | O(3)-Tb(1)-N(1) <sup>1</sup>               | 74.01(13)  |
| O(1) <sup>1</sup> -Tb(1)-O(2) <sup>1</sup> | 70.92(13)  | O(3) <sup>1</sup> -Tb(1)-N(1) <sup>1</sup> | 143.75(14) |
| O(3)-Tb(1)-O(2)                            | 120.50(13) | O(1)-Tb(1)-N(1) <sup>1</sup>               | 110.58(15) |
| O(3) <sup>1</sup> -Tb(1)-O(2)              | 137.39(13) | O(1) <sup>1</sup> -Tb(1)-N(1) <sup>1</sup> | 81.83(15)  |
| O(1)-Tb(1)-O(2)                            | 70.92(13)  | O(2) <sup>1</sup> -Tb(1)-N(1) <sup>1</sup> | 75.73(14)  |
| O(1) <sup>1</sup> -Tb(1)-O(2)              | 144.84(14) | O(2)-Tb(1)-N(1) <sup>1</sup>               | 74.48(14)  |
| O(2) <sup>1</sup> -Tb(1)-O(2)              | 78.22(16)  | N(1)-Tb(1)-N(1) <sup>1</sup>               | 141.3(2)   |
| O(3)-Tb(1)-N(1)                            | 143.75(14) | C(9)-N(1)-Tb(1)                            | 128.4(3)   |
| O(3) <sup>1</sup> -Tb(1)-N(1)              | 74.01(13)  | C(11)-N(1)-Tb(1)                           | 126.5(4)   |
| O(1)-Tb(1)-N(1)                            | 81.83(15)  | C(2)-O(1)-Tb(1)                            | 134.7(4)   |
| O(1) <sup>1</sup> -Tb(1)-N(1)              | 110.58(15) | C(4)-O(2)-Tb(1)                            | 134.3(4)   |
| O(2) <sup>1</sup> -Tb(1)-N(1)              | 74.47(14)  | C(7)-O(3)-Tb(1)                            | 134.0(3)   |
| O(2)-Tb(1)-N(1)                            | 75.73(14)  |                                            |            |

Table S3. Selected bond lengths [ $\text{\AA}$ ] and angles [deg] for compound **3**.

|                                            |            |                                            |            |
|--------------------------------------------|------------|--------------------------------------------|------------|
| Ho(1)-O(2) <sup>1</sup>                    | 2.332(4)   | O(2) <sup>1</sup> -Ho(1)-O(2)              | 142.3(2)   |
| Ho(1)-O(2)                                 | 2.332(4)   | O(2) <sup>1</sup> -Ho(1)-O(3)              | 74.49(15)  |
| Ho(1)-O(3) <sup>1</sup>                    | 2.333(3)   | O(2)-Ho(1)-O(3)                            | 75.67(15)  |
| Ho(1)-O(3)                                 | 2.333(3)   | O(2) <sup>1</sup> -Ho(1)-O(3) <sup>1</sup> | 75.67(15)  |
| Ho(1)-O(1)                                 | 2.347(4)   | O(2)-Ho(1)-O(3) <sup>1</sup>               | 74.49(15)  |
| Ho(1)-O(1) <sup>1</sup>                    | 2.347(4)   | O(3)-Ho(1)-O(3) <sup>1</sup>               | 74.26(16)  |
| Ho(1)-N(1) <sup>1</sup>                    | 2.458(5)   | O(2) <sup>1</sup> -Ho(1)-O(1) <sup>1</sup> | 71.54(14)  |
| Ho(1)-N(1)                                 | 2.458(5)   | O(2)-Ho(1)-O(1) <sup>1</sup>               | 144.99(14) |
| O(3)-Ho(1)-O(1) <sup>1</sup>               | 120.08(13) | O(2) <sup>1</sup> -Ho(1)-N(1) <sup>1</sup> | 110.58(15) |
| O(3) <sup>1</sup> -Ho(1)-O(1) <sup>1</sup> | 137.66(13) | O(2)-Ho(1)-N(1) <sup>1</sup>               | 82.08(15)  |
| O(2) <sup>1</sup> -Ho(1)-O(1)              | 144.99(14) | O(3)-Ho(1)-N(1) <sup>1</sup>               | 73.67(13)  |
| O(2)-Ho(1)-O(1)                            | 71.54(14)  | O(3) <sup>1</sup> -Ho(1)-N(1) <sup>1</sup> | 143.98(14) |
| O(3)-Ho(1)-O(1)                            | 137.66(13) | O(1) <sup>1</sup> -Ho(1)-N(1) <sup>1</sup> | 74.23(14)  |
| O(3) <sup>1</sup> -Ho(1)-O(1)              | 120.08(13) | O(1)-Ho(1)-N(1) <sup>1</sup>               | 75.93(14)  |
| O(1) <sup>1</sup> -Ho(1)-O(1)              | 77.86(18)  | N(1)-Ho(1)-N(1) <sup>1</sup>               | 141.4(2)   |
| O(2) <sup>1</sup> -Ho(1)-N(1)              | 82.08(15)  | C(9)-N(1)-Ho(1)                            | 128.4(4)   |
| O(2)-Ho(1)-N(1)                            | 110.58(15) | C(10)-N(1)-Ho(1)                           | 126.3(4)   |
| O(3)-Ho(1)-N(1)                            | 143.98(14) | C(2)-O(1)-Ho(1)                            | 134.5(4)   |
| O(3) <sup>1</sup> -Ho(1)-N(1)              | 73.67(13)  | C(4)-O(2)-Ho(1)                            | 134.2(5)   |
| O(1) <sup>1</sup> -Ho(1)-N(1)              | 75.93(14)  | C(7)-O(3)-Ho(1)                            | 133.7(3)   |
| O(1)-Ho(1)-N(1)                            | 74.23(14)  |                                            |            |

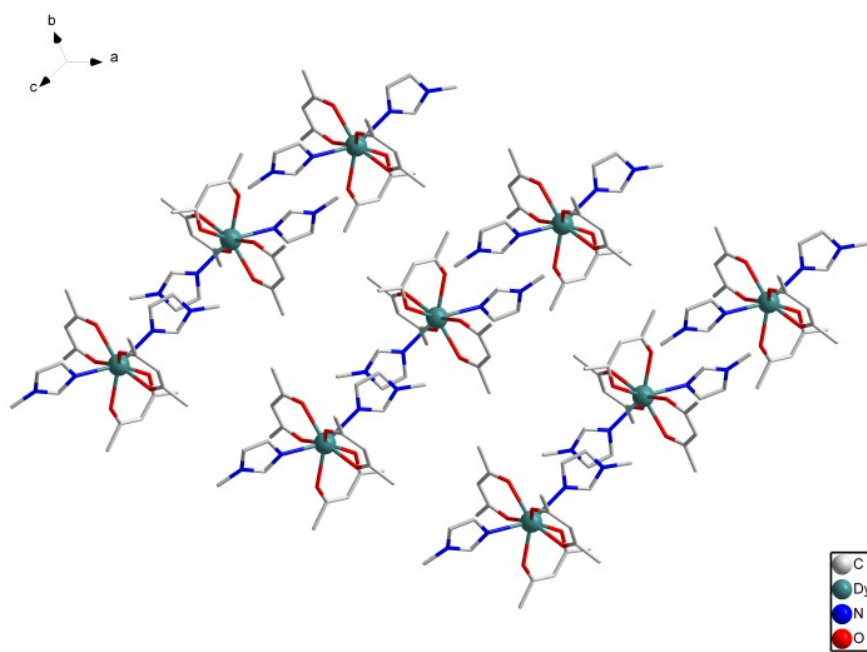

Fig. S1. Packing diagram of complex **1**. The hydrogen atoms and fluorine atoms are omitted for clarity.

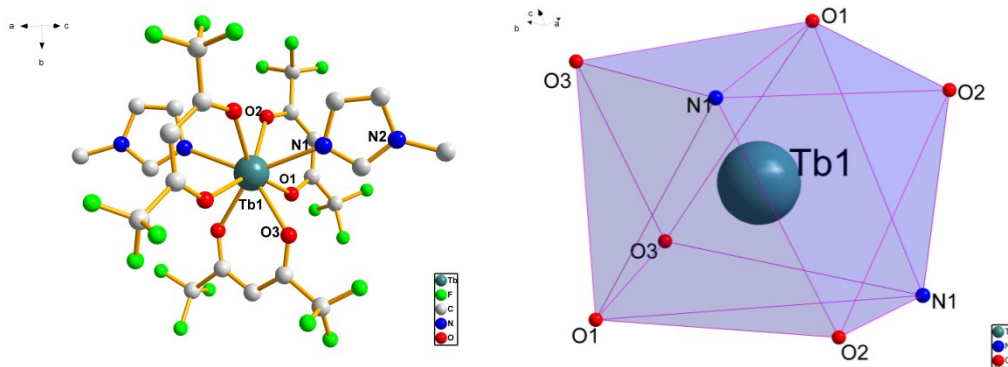

Fig. S2. Perspective view of complex [Tb(hfac)<sub>3</sub>·(1-MeIm)<sub>2</sub>] (H atoms were all omitted for clarity, left) and the coordination polyhedron of the Tb<sup>III</sup> ions (right).

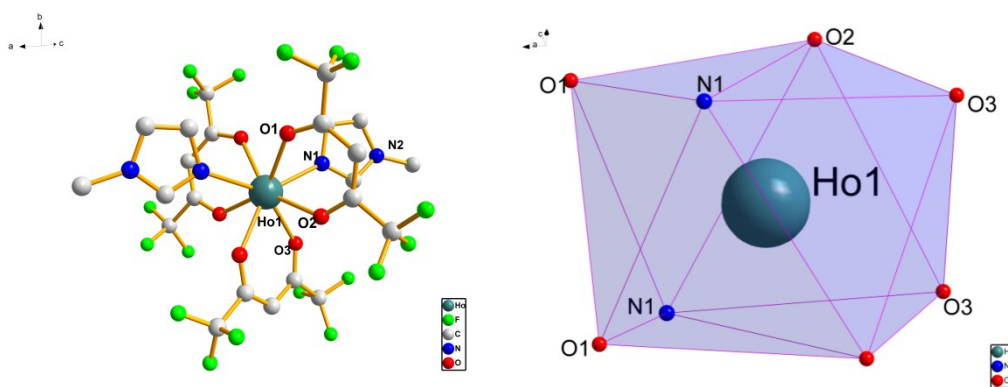

Fig. S3. Perspective view of complex [Ho(hfac)<sub>3</sub>·(1-MeIm)<sub>2</sub>] (H atoms were all omitted for clarity, left) and the coordination polyhedron of the Ho<sup>III</sup> ions (right).

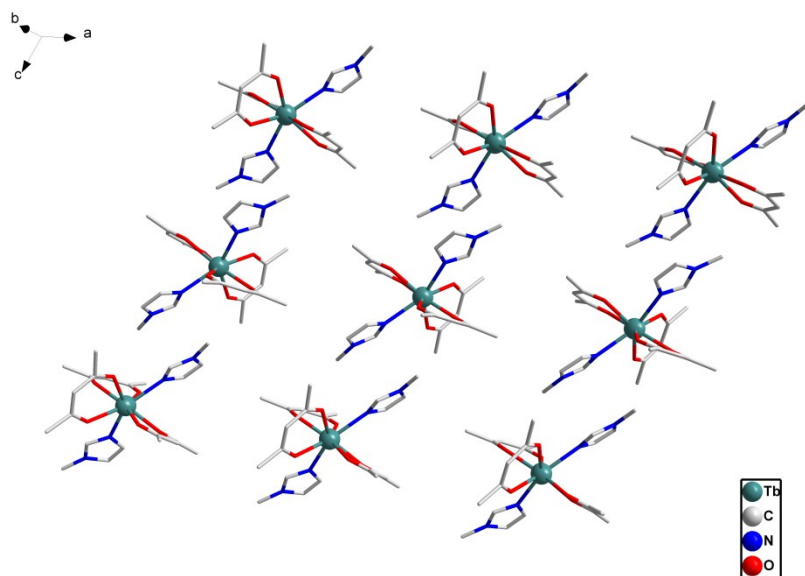

Fig. S4 Packing diagram of complex **2**. The hydrogen atoms and fluorine atoms are omitted for clarity.

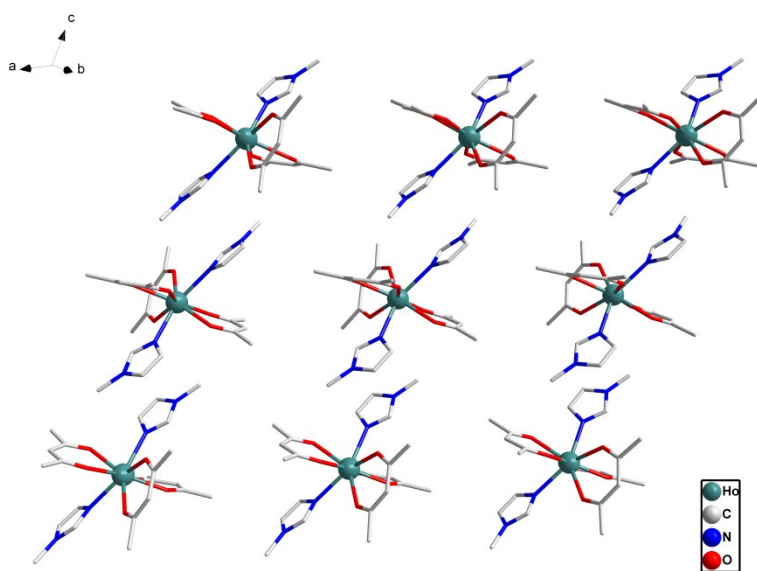

Fig.S5. Packing diagram of complex **3**. The hydrogen atoms and fluorine atoms are omitted for clarity.

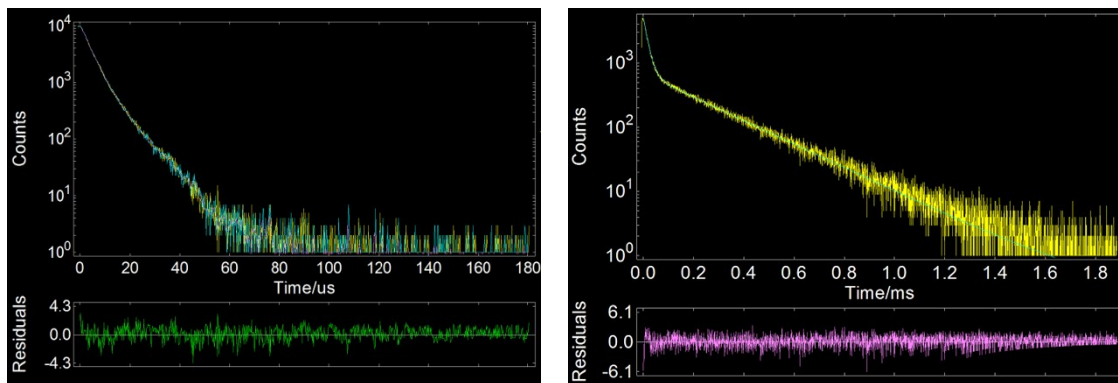

Fig. S6. Lifetime curve of compound Dy 1 (left) and Tb 2 (right).

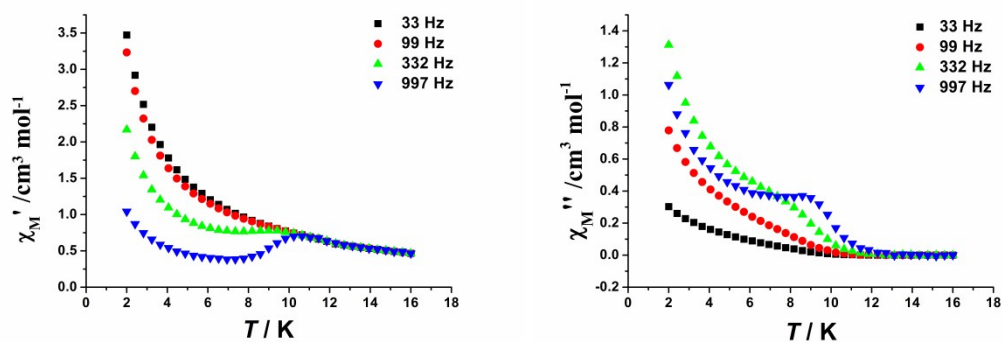

Fig. S7. In-phase and out-of-phase dynamic magnetic susceptibility of 1.



**Table S4** Fitting parameters by Dybye model from 2.0 K to 10.0 K of **1**.

| T/K | $\chi_s/\text{cm}^3\text{mol}^{-1}$ | $\chi_r/\text{cm}^3\text{mol}^{-1}$ | $\alpha_1$ |
|-----|-------------------------------------|-------------------------------------|------------|
| 2.0 | 0.30                                | 3.49                                | 0.1317     |
| 3.0 | 0.24                                | 2.39                                | 0.1190     |
| 3.5 | 0.25                                | 2.04                                | 0.0872     |
| 5.0 | 0.19                                | 1.45                                | 0.0761     |
| 6.5 | 0.17                                | 1.13                                | 0.0464     |
| 8.0 | 0.13                                | 0.92                                | 0.0349     |
| 9.0 | 0.10                                | 0.84                                | 0.0245     |
| 9.5 | 0.08                                | 0.77                                | 0.0210     |
| 10  | 0.03                                | 0.75                                | 0.0180     |

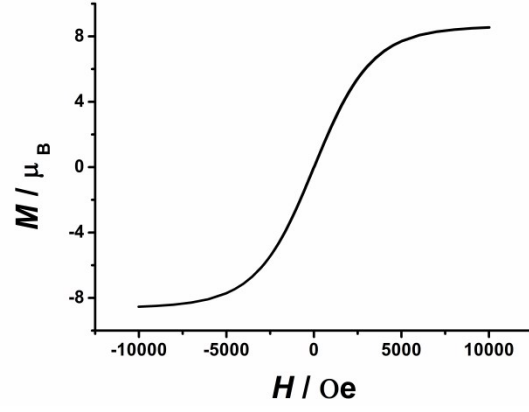

Fig. S8. Field dependence of the magnetization at 2 K showing the absence of hysteresis effect for **1**.

The magnetic data of **2** and **3** can be analyzed by the following approximate treatment of Eqs (2)-(4).

$$\chi_{\text{Tb}} = \frac{2Ng^2\beta^2}{kT} \left[ \frac{36\exp\left(\frac{-36\Delta}{kT}\right) + 25\exp\left(\frac{-25\Delta}{kT}\right) + 16\exp\left(\frac{-16\Delta}{kT}\right) + 9\exp\left(\frac{-9\Delta}{kT}\right) + 4\exp\left(\frac{-4\Delta}{kT}\right) + \exp\left(\frac{-\Delta}{kT}\right)}{2\exp\left(\frac{-36\Delta}{kT}\right) + 2\exp\left(\frac{-25\Delta}{kT}\right) + 2\exp\left(\frac{-16\Delta}{kT}\right) + 2\exp\left(\frac{-9\Delta}{kT}\right) + 2\exp\left(\frac{-4\Delta}{kT}\right) + 2\exp\left(\frac{-\Delta}{kT}\right) + 1} \right] \quad (2)$$

$$\chi_{\text{Ho}} = \frac{2Ng^2\beta^2}{kT} \left[ \frac{64\exp\left(\frac{-64\Delta}{kT}\right) + 49\exp\left(\frac{-49\Delta}{kT}\right) + 36\exp\left(\frac{-36\Delta}{kT}\right) + 25\exp\left(\frac{-25\Delta}{kT}\right) + 16\exp\left(\frac{-16\Delta}{kT}\right) + 9\exp\left(\frac{-9\Delta}{kT}\right) + 4\exp\left(\frac{-4\Delta}{kT}\right) + \exp\left(\frac{-\Delta}{kT}\right)}{2\exp\left(\frac{-64\Delta}{kT}\right) + 2\exp\left(\frac{-49\Delta}{kT}\right) + 2\exp\left(\frac{-36\Delta}{kT}\right) + 2\exp\left(\frac{-25\Delta}{kT}\right) + 2\exp\left(\frac{-16\Delta}{kT}\right) + 2\exp\left(\frac{-9\Delta}{kT}\right) + 2\exp\left(\frac{-4\Delta}{kT}\right) + 2\exp\left(\frac{-\Delta}{kT}\right) + 1} \right] \quad (3)$$

$$\chi_{\text{M}} = \frac{\chi(\text{Tb or Ho})}{1 - (2zJ'Ng^2\beta^2)\chi(\text{Tb or Ho})} \quad (4)$$

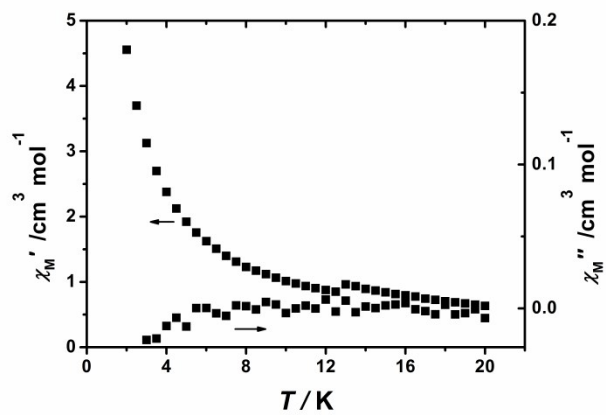

Fig. S9. In-phase and out-of-phase dynamic magnetic susceptibility of **2** under zero-dc field.

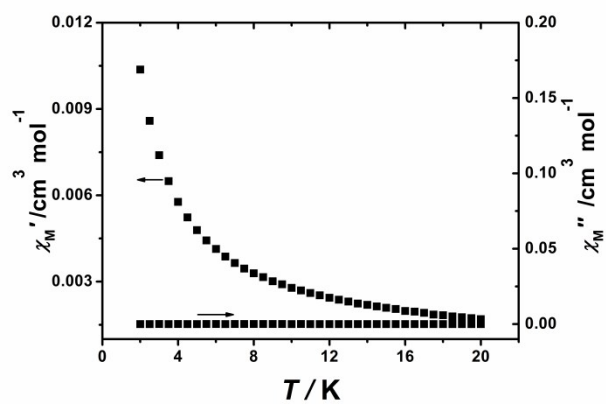

Fig. S10. In-phase and out-of-phase dynamic magnetic susceptibility of **3** under zero-dc field.
